# Supplementary material for: A Tool for Segmentation of Secondary Structures in 3D Cryo-EM Density Map Components Using Deep Convolutional Neural Networks
Source: Front Bioinform. 2021 Nov 3;1:710119. doi: 10.3389/fbinf.2021.710119 (PMC9581063; doi:10.3389/fbinf.2021.710119)
Supplement: Supplementary file 1 [file Table2.xlsx]

## Sheet: Sheet1
Supplementary Table 2 - The EMDB, PDB, and chain ID of the training set of 1216 chains
EMDB-ID	PDB-ID	Chain-ID
9537	5grs	E
9534	5gpn	g
9534	5gpn	Af
9534	5gpn	u
9534	5gpn	o
9534	5gpn	k
9534	5gpn	q
9534	5gpn	Ag
9534	5gpn	H
9534	5gpn	t
9064	6mb2	A
8812	5wda	A
8789	5w9n	B
8744	5vy8	A
8737	5vvs	F
8737	5vvs	K
8737	5vvs	G
8737	5vvs	C
8737	5vvs	J
8735	5vvr	K
8735	5vvr	J
8735	5vvr	G
8735	5vvr	H
8735	5vvr	C
8726	5voz	N
8726	5voz	e
8724	5vox	e
8724	5vox	N
8723	5vov	E
8722	5vou	E
8675	5vhh	Y
8674	5vhf	U
8668	5vfu	T
8668	5vfu	R
8668	5vfu	L
8668	5vfu	P
8668	5vfu	O
8668	5vfu	Q
8668	5vfu	H
8668	5vfu	I
8667	5vft	S
8667	5vft	T
8667	5vft	R
8621	5uz4	T
8621	5uz4	L
8621	5uz4	P
8621	5uz4	C
8621	5uz4	F
8621	5uz4	O
8621	5uz4	Z
8621	5uz4	N
8621	5uz4	B
8595	5upw	A
8549	5uie	A
8528	5ubq	C
8528	5ubq	D
8518	5u8s	B
8518	5u8s	C
8518	5u8s	3
8518	5u8s	E
8513	5u6r	A
8474	5u03	A
8473	5tzs	6
8473	5tzs	e
8473	5tzs	m
8473	5tzs	C
8473	5tzs	l
8473	5tzs	j
8473	5tzs	9
8473	5tzs	K
8473	5tzs	q
8473	5tzs	F
8473	5tzs	b
8473	5tzs	5
8400	5tcr	Q
8400	5tcr	P
8358	5t4p	H
8357	5t4o	H
8335	5t0h	S
8335	5t0h	H
8335	5t0h	G
8335	5t0h	O
8335	5t0h	P
8335	5t0h	L
8335	5t0h	I
8335	5t0h	R
8286	5ku2	3
8285	5ku0	3
8278	5kp9	B
8256	5kk2	E
8190	5k0y	Z
8190	5k0y	f
8190	5k0y	b
8190	5k0y	t
8149	5jbh	I
8149	5jbh	D
8148	5jb3	I
8148	5jb3	Q
8148	5jb3	D
8148	5jb3	E
8143	5jpq	z
8143	5jpq	q
8143	5jpq	g
8143	5jpq	d
8143	5jpq	x
8143	5jpq	H
8143	5jpq	u
8135	5iya	F
8135	5iya	J
8135	5iya	K
8135	5iya	M
8135	5iya	P
8135	5iya	C
8134	5iy9	K
8134	5iy9	M
8134	5iy9	F
8134	5iy9	J
8134	5iy9	G
8134	5iy9	C
8134	5iy9	P
8133	5iy8	M
8130	5j4z	A
8130	5j4z	g
8130	5j4z	AH
8130	5j4z	AG
8130	5j4z	H
8130	5j4z	Z
8130	5j4z	N
8130	5j4z	M
8130	5j4z	BL
8130	5j4z	AK
8130	5j4z	AC
8130	5j4z	V
8130	5j4z	Y
8130	5j4z	W
8130	5j4z	BN
8130	5j4z	BO
8130	5j4z	AJ
8130	5j4z	BK
8130	5j4z	AF
8130	5j4z	BP
8130	5j4z	BJ
8130	5j4z	AB
8130	5j4z	F
8129	5j8k	g
8129	5j8k	M
8129	5j8k	V
8129	5j8k	AH
8129	5j8k	A
8129	5j8k	N
8129	5j8k	Y
8129	5j8k	H
8129	5j8k	AG
8129	5j8k	AK
8129	5j8k	AC
8129	5j8k	Z
8129	5j8k	W
8129	5j8k	AB
8128	5j7y	A
8128	5j7y	g
8128	5j7y	H
8128	5j7y	AH
8128	5j7y	M
8128	5j7y	N
8128	5j7y	Z
8128	5j7y	AK
8128	5j7y	AC
8128	5j7y	V
8128	5j7y	Y
8128	5j7y	W
8128	5j7y	AG
8128	5j7y	AJ
8128	5j7y	BJ
8128	5j7y	BL
8128	5j7y	AB
8128	5j7y	O
8128	5j7y	AF
8128	5j7y	E
8128	5j7y	F
8128	5j7y	C
8060	5hny	A
8060	5hny	B
8059	5hnx	A
8059	5hnx	B
8058	5hnw	A
8058	5hnw	B
8016	5gar	D
7845	6dbl	B
7439	6ca0	A
7439	6ca0	E
7343	6c54	A
7322	6c05	A
7103	6bjs	G
7103	6bjs	K
7093	6bf9	A
7091	6bf7	A
7090	6bf6	A
7066	6b7z	A
7065	6b7y	A
7055	6b5b	F
6928	5zfv	F
6927	5zfu	G
6890	5z57	7
6890	5z57	N
6890	5z57	5
6889	5z56	7
6889	5z56	N
6889	5z56	5
6889	5z56	z
6889	5z56	6
6823	5ydz	A
6810	5y5x	D
6695	5wyj	SF
6695	5wyj	MC
6695	5wyj	MA
6695	5wyj	K1
6695	5wyj	3G
6695	5wyj	AD
6695	5wyj	U4
6695	5wyj	P1
6695	5wyj	SR
6695	5wyj	R1
6695	5wyj	3B
6695	5wyj	MB
6695	5wyj	SC
6695	5wyj	SO
6695	5wyj	SX
6695	5wyj	SM
6693	5wvi	7
6693	5wvi	k
6693	5wvi	6
6693	5wvi	5
6693	5wvi	4
6693	5wvi	L
6693	5wvi	B
6693	5wvi	1
6693	5wvi	H
6683	5wrh	A
6585	5imr	j
6585	5imr	v
6585	5imr	e
6585	5imr	m
6585	5imr	r
6585	5imr	z
6585	5imr	o
6585	5imr	t
6585	5imr	k
6585	5imr	f
6585	5imr	g
6585	5imr	l
6456	3jbn	AG
6456	3jbn	Ab
6456	3jbn	D
6456	3jbn	AN
6456	3jbn	A6
6456	3jbn	K
6456	3jbn	A5
6456	3jbn	S
6456	3jbn	A7
6456	3jbn	AK
6456	3jbn	W
6456	3jbn	I
6456	3jbn	Y
6456	3jbn	L
6456	3jbn	Q
6456	3jbn	O
6456	3jbn	1
6456	3jbn	B
6456	3jbn	G
6456	3jbn	AI
6456	3jbn	AQ
6456	3jbn	A1
6456	3jbn	AX
6456	3jbn	E
6456	3jbn	M
6456	3jbn	AR
6456	3jbn	AU
6456	3jbn	A0
6456	3jbn	3
6456	3jbn	F
6456	3jbn	V
6456	3jbn	AW
6456	3jbn	A2
6456	3jbn	AY
6456	3jbn	P
6456	3jbn	X
6456	3jbn	AV
6456	3jbn	A9
6452	3jbo	AG
6452	3jbo	AQ
6452	3jbo	A5
6452	3jbo	Ab
6452	3jbo	K
6452	3jbo	AN
6452	3jbo	A7
6452	3jbo	Z
6452	3jbo	AK
6452	3jbo	D
6452	3jbo	AY
6452	3jbo	A6
6452	3jbo	Y
6452	3jbo	G
6452	3jbo	AW
6452	3jbo	AX
6452	3jbo	I
6452	3jbo	AO
6452	3jbo	A9
6452	3jbo	P
6452	3jbo	AR
6452	3jbo	1
6452	3jbo	L
6452	3jbo	A2
6452	3jbo	AI
6452	3jbo	W
6452	3jbo	X
6452	3jbo	AU
6452	3jbo	S
6452	3jbo	O
6452	3jbo	A1
6452	3jbo	E
6452	3jbo	A0
6452	3jbo	AV
6452	3jbo	B
6452	3jbo	M
6452	3jbo	V
6448	3jbj	A
6447	3jbk	A
6446	3jbi	A
6284	3j9t	N
6284	3j9t	Y
6188	3j8y	A
6188	3j8y	B
6188	3j8y	K
6187	3j8x	B
6187	3j8x	A
6187	3j8x	K
6149	3j8g	N
6149	3j8g	G
6149	3j8g	S
6149	3j8g	2
6149	3j8g	6
6149	3j8g	E
6149	3j8g	0
6149	3j8g	T
6149	3j8g	Q
6149	3j8g	U
6149	3j8g	M
6149	3j8g	1
6149	3j8g	J
6149	3j8g	D
5977	3j78	86
5977	3j78	14
5977	3j78	84
5977	3j78	89
5977	3j78	75
5977	3j78	79
5977	3j78	S3
5977	3j78	S5
5977	3j78	L7
5977	3j78	13
5977	3j78	S0
5977	3j78	61
5977	3j78	S1
5977	3j78	70
5977	3j78	S8
5977	3j78	65
5977	3j78	68
5977	3j78	S9
5977	3j78	24
5977	3j78	21
5977	3j78	16
5977	3j78	27
5977	3j78	91
5977	3j78	64
5977	3j78	22
5977	3j78	S7
5977	3j78	81
5977	3j78	66
5977	3j78	80
5977	3j78	29
5977	3j78	72
5977	3j78	92
5977	3j78	L9
5977	3j78	88
5977	3j78	71
5977	3j78	18
5977	3j78	S2
5977	3j78	67
5977	3j78	76
5977	3j78	73
5977	3j78	L5
5977	3j78	78
5977	3j78	11
5976	3j77	22
5976	3j77	79
5976	3j77	84
5976	3j77	80
5976	3j77	66
5976	3j77	L7
5976	3j77	64
5976	3j77	89
5976	3j77	92
5976	3j77	72
5976	3j77	18
5976	3j77	75
5976	3j77	S7
5976	3j77	13
5976	3j77	68
5976	3j77	L9
5976	3j77	S2
5976	3j77	71
5976	3j77	76
5976	3j77	65
5976	3j77	70
5976	3j77	S0
5976	3j77	L5
5976	3j77	L3
5976	3j77	60
5976	3j77	24
5976	3j77	S5
5976	3j77	S9
5976	3j77	21
5976	3j77	17
5976	3j77	61
5976	3j77	23
5976	3j77	S4
5976	3j77	S1
5976	3j77	82
5976	3j77	16
5943	3j6y	76
5943	3j6y	L9
5943	3j6y	22
5943	3j6y	L7
5943	3j6y	54
5943	3j6y	50
5943	3j6y	S2
5943	3j6y	69
5943	3j6y	74
5943	3j6y	65
5943	3j6y	70
5943	3j6y	21
5943	3j6y	56
5943	3j6y	66
5943	3j6y	64
5943	3j6y	79
5943	3j6y	55
5943	3j6y	17
5943	3j6y	13
5943	3j6y	61
5943	3j6y	58
5943	3j6y	L5
5943	3j6y	S8
5943	3j6y	77
5943	3j6y	57
5943	3j6y	S0
5943	3j6y	62
5943	3j6y	S9
5943	3j6y	63
5943	3j6y	S5
5943	3j6y	51
5943	3j6y	72
5943	3j6y	L3
5943	3j6y	30
5942	3j6x	22
5942	3j6x	74
5942	3j6x	62
5942	3j6x	L7
5942	3j6x	79
5942	3j6x	13
5942	3j6x	71
5942	3j6x	L9
5942	3j6x	76
5942	3j6x	23
5942	3j6x	54
5942	3j6x	S3
5942	3j6x	66
5942	3j6x	17
5942	3j6x	60
5942	3j6x	55
5942	3j6x	L3
5942	3j6x	69
5942	3j6x	82
5942	3j6x	65
5942	3j6x	S2
5942	3j6x	61
5942	3j6x	18
5942	3j6x	56
5942	3j6x	S8
5942	3j6x	21
5942	3j6x	77
5942	3j6x	L5
5942	3j6x	50
5942	3j6x	S0
5942	3j6x	64
5942	3j6x	57
5942	3j6x	S9
5942	3j6x	24
5942	3j6x	S5
5942	3j6x	78
5942	3j6x	72
5942	3j6x	10
5942	3j6x	30
5942	3j6x	S4
5942	3j6x	14
5942	3j6x	63
5942	3j6x	68
5897	3j6g	A
5897	3j6g	B
5888	3jbc	3
5888	3jbc	2
5888	3jbc	4
5800	4v7d	AP
5800	4v7d	BT
5800	4v7d	A7
5800	4v7d	A3
5800	4v7d	AF
5800	4v7d	AS
5800	4v7d	BL
5800	4v7d	A2
5800	4v7d	AQ
5800	4v7d	AN
5800	4v7d	AT
5799	4v7c	BU
5799	4v7c	B6
5799	4v7c	B2
5799	4v7c	BO
5799	4v7c	BP
5799	4v7c	AT
5799	4v7c	B1
5799	4v7c	BM
5799	4v7c	AR
5799	4v7c	AC
5799	4v7c	AU
5784	3j5s	I
5779	3j5m	A
5775	4v7b	AO
5775	4v7b	BN
5775	4v7b	BZ
5775	4v7b	B2
5775	4v7b	AT
5775	4v7b	BQ
5775	4v7b	B3
5775	4v7b	BP
5775	4v7b	BT
5775	4v7b	AN
5775	4v7b	BM
5775	4v7b	BY
5775	4v7b	BX
5775	4v7b	AF
5775	4v7b	AR
5775	4v7b	BG
5771	3j5l	M
5771	3j5l	X
5771	3j5l	Z
5771	3j5l	N
5771	3j5l	S
5771	3j5l	E
5771	3j5l	P
5771	3j5l	T
5771	3j5l	G
5771	3j5l	L
5771	3j5l	Y
5771	3j5l	2
5771	3j5l	3
5771	3j5l	J
5771	3j5l	0
5771	3j5l	Q
5771	3j5l	C
5691	4v4n	AW
5691	4v4n	AT
5691	4v4n	AS
5592	4v6x	CV
5592	4v6x	AW
5592	4v6x	AC
5592	4v6x	CH
5592	4v6x	AA
5592	4v6x	CT
5592	4v6x	AN
5592	4v6x	Cq
5592	4v6x	AX
5592	4v6x	CY
5592	4v6x	AV
5592	4v6x	Ce
5562	4v6v	AF
5423	3j1r	A
5386	4v6t	AT
5386	4v6t	BT
5386	4v6t	BY
5386	4v6t	AF
5386	4v6t	BN
5386	4v6t	AB
5386	4v6t	BK
5352	3j0r	A
5249	3izm	A
5168	3mfp	A
5036	4v69	AF
5036	4v69	AG
5036	4v69	BQ
5036	4v69	BZ
5036	4v69	AT
5036	4v69	BE
5036	4v69	AR
5036	4v69	BY
5036	4v69	AC
5036	4v69	AN
5036	4v69	BX
5036	4v69	AZ
5036	4v69	BN
5036	4v69	BS
5036	4v69	B3
5036	4v69	BT
5030	4v68	BQ
5030	4v68	BW
5030	4v68	AT
5030	4v68	BR
5030	4v68	AR
5030	4v68	BU
5030	4v68	AL
5030	4v68	AH
5030	4v68	BZ
5030	4v68	B2
5030	4v68	BN
5030	4v68	B8
5030	4v68	B1
5030	4v68	B0
5030	4v68	B5
5030	4v68	BS
5030	4v68	AO
5030	4v68	AG
5030	4v68	BF
5030	4v68	AJ
5030	4v68	BG
5030	4v68	AN
5030	4v68	AM
5030	4v68	BT
5030	4v68	BH
4324	6fvy	V
4324	6fvy	b
4324	6fvy	g
4324	6fvy	W
4324	6fvy	f
4324	6fvy	d
4324	6fvy	T
4324	6fvy	e
4321	6fvv	V
4321	6fvv	W
4321	6fvv	b
4321	6fvv	e
4321	6fvv	T
4321	6fvv	g
4315	6ftg	Q
4315	6ftg	V
4242	6fec	f
4242	6fec	e
4242	6fec	b
4242	6fec	H
4182	6f42	F
4182	6f42	Q
4182	6f42	J
4182	6f42	K
4182	6f42	N
4182	6f42	C
4182	6f42	M
4182	6f42	P
4177	6f38	L
4177	6f38	H
4177	6f38	J
4177	6f38	V
4156	5m54	D
4156	5m54	E
4156	5m54	C
4154	5m50	D
4154	5m50	E
4154	5m50	C
4122	5lzb	N
4122	5lzb	M
4122	5lzb	2
4122	5lzb	E
4122	5lzb	P
4122	5lzb	3
4122	5lzb	Y
4122	5lzb	T
4122	5lzb	Z
4122	5lzb	Q
4122	5lzb	X
4122	5lzb	0
4122	5lzb	J
4107	5luf	N
4102	5lqz	Y
4102	5lqz	K
4102	5lqz	J
4102	5lqz	U
4102	5lqz	D
4102	5lqz	I
4101	5lqy	J
4101	5lqy	Y
4101	5lqy	U
4101	5lqy	I
4101	5lqy	D
4100	5lqx	U
4100	5lqx	Y
4100	5lqx	I
4100	5lqx	D
4098	5lqp	AB
4089	5ln3	A
4089	5ln3	6
4089	5ln3	U
4089	5ln3	2
4089	5ln3	W
4089	5ln3	S
4089	5ln3	B
4089	5ln3	R
4089	5ln3	3
4089	5ln3	F
4089	5ln3	C
4089	5ln3	7
4089	5ln3	H
4089	5ln3	5
4089	5ln3	V
4089	5ln3	T
4078	5lms	O
4078	5lms	T
4078	5lms	V
4078	5lms	H
4078	5lms	P
4078	5lms	L
4078	5lms	B
4078	5lms	F
4078	5lms	G
4078	5lms	I
4078	5lms	R
4078	5lms	J
4075	5lmp	O
4075	5lmp	J
4075	5lmp	P
4075	5lmp	F
4075	5lmp	C
4075	5lmp	H
4075	5lmp	T
4075	5lmp	N
4075	5lmp	G
4075	5lmp	R
4075	5lmp	B
4075	5lmp	L
4075	5lmp	K
4046	5lfb	1A
4044	5ler	1A
4041	5ldx	d
4041	5ldx	A
4041	5ldx	o
4041	5ldx	b
4041	5ldx	T
4041	5ldx	N
4041	5ldx	f
4041	5ldx	e
4041	5ldx	m
4041	5ldx	W
4041	5ldx	l
4039	5ldf	A
3949	6esh	A
3949	6esh	D
3949	6esh	C
3948	6esg	A
3948	6esg	D
3906	6eny	F
3896	6emk	E
3850	5oqm	C
3850	5oqm	f
3850	5oqm	3
3850	5oqm	e
3850	5oqm	o
3850	5oqm	6
3850	5oqm	X
3850	5oqm	0
3850	5oqm	I
3780	5ocu	A
3780	5ocu	B
3778	5oam	A
3778	5oam	B
3761	5o8o	A
3720	5nzr	Z
3706	5nw4	k
3706	5nw4	l
3706	5nw4	Z
3683	5nrl	M
3683	5nrl	K
3683	5nrl	L
3667	5nol	A
3663	5no4	P
3663	5no4	T
3663	5no4	R
3663	5no4	O
3663	5no4	F
3663	5no4	Z
3663	5no4	K
3662	5no3	P
3662	5no3	T
3662	5no3	R
3662	5no3	O
3662	5no3	F
3662	5no3	K
3662	5no3	Z
3662	5no3	Q
3661	5no2	T
3661	5no2	O
3661	5no2	F
3661	5no2	R
3661	5no2	P
3661	5no2	Z
3661	5no2	K
3658	5nl2	A
3636	5ng5	M
3634	5net	4
3621	5nd3	A
3620	5nd2	A
3594	5n61	K
3594	5n61	J
3594	5n61	D
3594	5n61	F
3594	5n61	C
3594	5n61	R
3594	5n61	G
3594	5n61	H
3592	5n60	J
3591	5n5z	F
3590	5n5y	K
3590	5n5y	J
3590	5n5y	D
3590	5n5y	F
3590	5n5y	G
3581	5myj	BW
3581	5myj	BQ
3581	5myj	BF
3581	5myj	BT
3581	5myj	BV
3581	5myj	BH
3581	5myj	AO
3581	5myj	B4
3581	5myj	AU
3581	5myj	AG
3581	5myj	B7
3581	5myj	AS
3581	5myj	BM
3581	5myj	BG
3581	5myj	AF
3581	5myj	AT
3581	5myj	BR
3581	5myj	B1
3581	5myj	B0
3581	5myj	BN
3581	5myj	BO
3581	5myj	BD
3581	5myj	BS
3580	5my1	F
3580	5my1	P
3580	5my1	T
3580	5my1	L
3545	5mqf	N
3545	5mqf	R
3545	5mqf	V
3544	5mq7	0A
3537	5mpc	e
3537	5mpc	d
3537	5mpc	R
3537	5mpc	g
3537	5mpc	V
3536	5mpb	g
3536	5mpb	e
3536	5mpb	V
3536	5mpb	R
3530	5mm7	B
3530	5mm7	A
3491	5mdx	L
3491	5mdx	X
3491	5mdx	Z
3491	5mdx	T
3491	5mdx	M
3491	5mdx	W
3491	5mdx	I
3491	5mdx	K
3491	5mdx	A
3491	5mdx	F
3491	5mdx	E
3491	5mdx	D
3491	5mdx	S
3485	5mdg	A
3484	5mdf	A
3483	5mde	A
3482	5mdd	A
3481	5mdc	A
3480	5mdb	A
3479	5mda	A
3478	5md9	A
3477	5md8	A
3475	5md7	A
3474	5md6	A
3473	5md5	A
3472	5md4	A
3471	5md3	A
3470	5md2	A
3469	5md1	A
3468	5md0	A
3467	5mcz	A
3465	5mcx	A
3440	5g5p	A
3436	5g4f	A
3206	5fl2	A
3204	5fkx	A
3187	5fj7	C
3170	5fil	V
3170	5fil	I
3170	5fil	S
3170	5fil	D
3169	5fik	V
3169	5fik	H
3169	5fik	S
3169	5fik	I
3168	5fij	I
3168	5fij	V
3168	5fij	S
3168	5fij	D
3167	5ari	V
3167	5ari	S
3167	5ari	H
3167	5ari	I
3167	5ari	D
3166	5arh	S
3166	5arh	V
3166	5arh	I
3166	5arh	D
3166	5arh	H
3165	5are	S
3165	5are	I
3165	5are	V
3165	5are	D
3165	5are	H
3164	5ara	V
3164	5ara	H
3164	5ara	I
3164	5ara	S
3164	5ara	D
3101	5a9e	A
3064	5a6g	B
3049	3jaq	W
3049	3jaq	m
3049	3jaq	e
3049	3jaq	C
3049	3jaq	Y
3049	3jaq	N
3049	3jaq	d
3049	3jaq	V
3049	3jaq	A
3020	5a2t	A
2925	5a31	R
2917	5aka	G
2917	5aka	N
2917	5aka	S
2917	5aka	2
2917	5aka	Q
2917	5aka	F
2917	5aka	E
2917	5aka	K
2917	5aka	3
2917	5aka	Y
2917	5aka	X
2917	5aka	Z
2917	5aka	C
2860	5afu	Y
2860	5afu	L
2860	5afu	H
2860	5afu	J
2860	5afu	K
2860	5afu	b
2844	4ue5	S
2844	4ue5	E
2799	5flz	E
2785	4v1n	K
2785	4v1n	C
2785	4v1n	F
2785	4v1n	J
2784	4v1m	F
2784	4v1m	K
2784	4v1m	J
2784	4v1m	C
2784	4v1m	I
2784	4v1m	H
2706	4usn	A
2683	4ujc	CV
2683	4ujc	CK
2683	4ujc	BV
2682	4ujd	CV
2682	4ujd	AV
2678	4upc	A
2620	4uje	BW
2620	4uje	BN
2620	4uje	BK
2620	4uje	BR
2620	4uje	CG
2620	4uje	BC
2620	4uje	CQ
2620	4uje	BI
2620	4uje	CZ
2620	4uje	BA
2620	4uje	CH
2620	4uje	BT
2620	4uje	CN
2620	4uje	BV
2620	4uje	CV
2620	4uje	BQ
2620	4uje	CX
2620	4uje	CI
2620	4uje	BE
2620	4uje	CS
2620	4uje	CT
2620	4uje	BJ
2620	4uje	CJ
2605	4csu	N
2605	4csu	Q
2605	4csu	M
2596	4cr4	R
2595	4cr3	Y
2594	4cr2	D
2594	4cr2	E
2594	4cr2	C
2594	4cr2	A
2594	4cr2	7
2594	4cr2	F
2594	4cr2	G
2594	4cr2	1
2594	4cr2	Y
2594	4cr2	B
2594	4cr2	V
2594	4cr2	6
2594	4cr2	5
2594	4cr2	4
2594	4cr2	T
2594	4cr2	2
2594	4cr2	L
2594	4cr2	R
2510	4cg7	C
2422	4v8z	AW
2422	4v8z	BU
2422	4v8z	BP
2422	4v8z	AC
2422	4v8z	AN
2422	4v8z	BX
2422	4v8z	AB
2422	4v8z	AH
2422	4v8z	BT
2422	4v8z	BB
2422	4v8z	AV
2422	4v8z	BN
2422	4v8z	AR
2422	4v8z	BD
2422	4v8z	AX
2422	4v8z	AY
2422	4v8z	BS
2422	4v8z	BH
2422	4v8z	BY
2422	4v8z	A4
2422	4v8z	BI
2422	4v8z	AA
2387	4bpq	B
2387	4bpq	A
2239	4v8m	Bg
2239	4v8m	BP
2239	4v8m	AJ
2239	4v8m	AH
2239	4v8m	BI
2239	4v8m	BO
2239	4v8m	AP
2239	4v8m	BK
2239	4v8m	AG
2239	4v8m	AC
2239	4v8m	BQ
2239	4v8m	BV
2239	4v8m	A4
2239	4v8m	A6
2239	4v8m	A5
2239	4v8m	AL
2239	4v8m	Bf
2239	4v8m	Be
2239	4v8m	BU
2237	3zee	A
2221	2ynj	A
2169	4v8t	k
2165	4b4t	6
2165	4b4t	1
2165	4b4t	4
2165	4b4t	5
2165	4b4t	G
2165	4b4t	D
2165	4b4t	2
2165	4b4t	C
2165	4b4t	V
2165	4b4t	H
2165	4b4t	B
2098	4atx	B
2095	4atu	I
2005	4abo	I
1858	4v6m	AO
1858	4v6m	AT
1858	4v6m	BN
1858	4v6m	BQ
1858	4v6m	BT
1858	4v6m	BZ
1858	4v6m	BE
1858	4v6m	BJ
1858	4v6m	BM
1858	4v6m	BF
1849	4v6k	AF
1849	4v6k	AO
1798	4v5m	B2
1798	4v5m	AO
1798	4v5m	BR
1798	4v5m	BW
1798	4v5m	BU
1798	4v5m	B8
1798	4v5m	BO
1798	4v5m	AL
1798	4v5m	BQ
1798	4v5m	BN
1798	4v5m	BZ
1798	4v5m	B5
1798	4v5m	BP
1788	2xrp	I
1780	4v7e	CR
1780	4v7e	CP
1780	4v7e	Bf
1780	4v7e	BH
1780	4v7e	BA
1780	4v7e	CT
1780	4v7e	CY
1780	4v7e	CB
1780	4v7e	CN
1780	4v7e	CG
1780	4v7e	BS
1780	4v7e	BU
1780	4v7e	BJ
1780	4v7e	BW
1780	4v7e	BC
1780	4v7e	BK
1780	4v7e	Co
1780	4v7e	BX
1780	4v7e	CV
1780	4v7e	Bb
1780	4v7e	BE
1780	4v7e	CW
1780	4v7e	CA
1740	3c92	H
1740	3c92	A
1733	3c91	H
1733	3c91	A
1724	4v7a	AO
1657	4v5h	AT
1657	4v5h	BN
1657	4v5h	BM
1657	4v5h	BS
1657	4v5h	AO
1657	4v5h	BQ
1657	4v5h	AG
1657	4v5h	B0
1657	4v5h	BT
1657	4v5h	AF
1657	4v5h	B2
1657	4v5h	AR
1657	4v5h	BE
1657	4v5h	B1
1657	4v5h	B6
1657	4v5h	AN
1657	4v5h	B7
1657	4v5h	B3
1657	4v5h	AC
1657	4v5h	BP
1657	4v5h	AL
1657	4v5h	BL
1657	4v5h	BU
1657	4v5h	AK
1657	4v5h	AP
1657	4v5h	BJ
1657	4v5h	AB
1657	4v5h	AU
1657	4v5h	BK
1657	4v5h	BG
1657	4v5h	BD
1657	4v5h	BC
1652	2wwb	N
1652	2wwb	O
1652	2wwb	K
1480	4v5z	B8
1480	4v5z	Ao
1480	4v5z	Bv
1340	2p4n	A
1340	2p4n	B
1264	2j37	6
1264	2j37	4
1261	2j28	P
1121	1z8y	I
1087	2i68	A
139	6h58	x
92	6gym	K
92	6gym	F
92	6gym	J
92	6gym	D
92	6gym	R
92	6gym	3
92	6gym	G
92	6gym	X
92	6gym	O
92	6gym	C
92	6gym	I
90	6gyk	R
90	6gyk	F
90	6gyk	O
90	6gyk	Q
90	6gyk	I
