# Supplementary material for: A Tool for Segmentation of Secondary Structures in 3D Cryo-EM Density Map Components Using Deep Convolutional Neural Networks
Source: Front Bioinform. 2021 Nov 3;1:710119. doi: 10.3389/fbinf.2021.710119 (PMC9581063; doi:10.3389/fbinf.2021.710119)
Supplement: Supplementary file 2 [file Table1.xlsx]

## Sheet: Sheet1
Supplementary Table 1 - The EMDB, PDB, and chain ID for the test set of 28 chains
EMDB-ID	PDB-ID	Chain-ID
1798	4v5m	AE
2994	5a21	G
3206	5fl2	K
3491	5mdx	H
3850	5oqm	4
3850	5oqm	g
3948	6esg	B
4041	5ldx	I
4078	5lms	D
4141	5m1s	B
4182	6f42	G
5942	3j6x	25
5943	3j6y	80
6149	3j8g	W
6446	3jbi	V
6456	3jbn	AL
6810	5y5x	H
7454	6d84	S
8016	5gar	O
8128	5j7y	K
8129	5j8k	AA
8129	5j8k	D
8130	5j4z	B
8135	5iya	E
8357	5t4o	L
8518	5u8s	A
8693	5viy	A
9534	5gpn	Ae
